# Supplementary material
Source: MDPI journal article supplement (https://www.mdpi.com/2571-6255/5/5/155)
Supplement: s1 [file s1]

## Supplementary material S

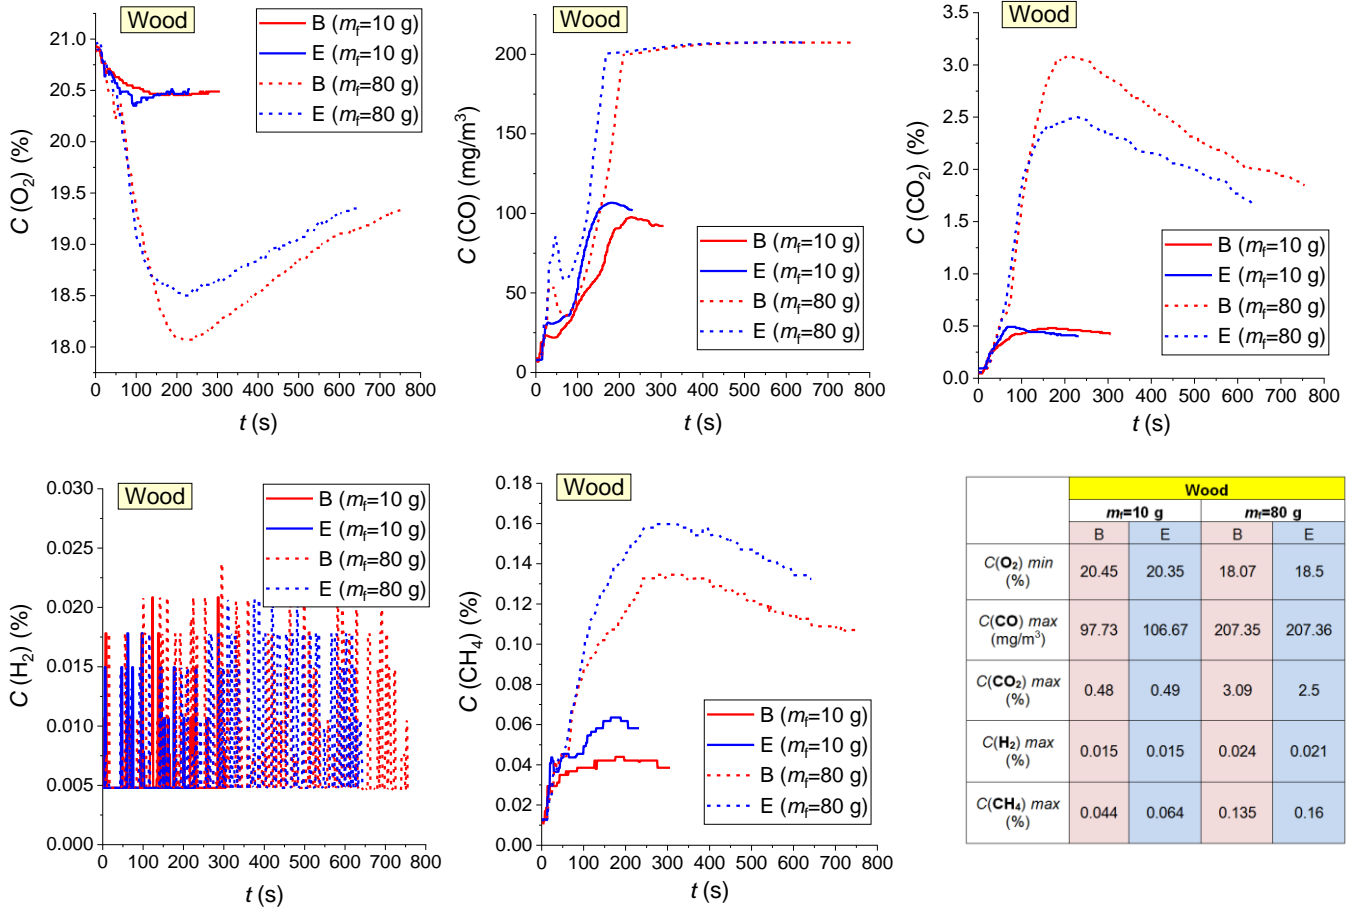

a

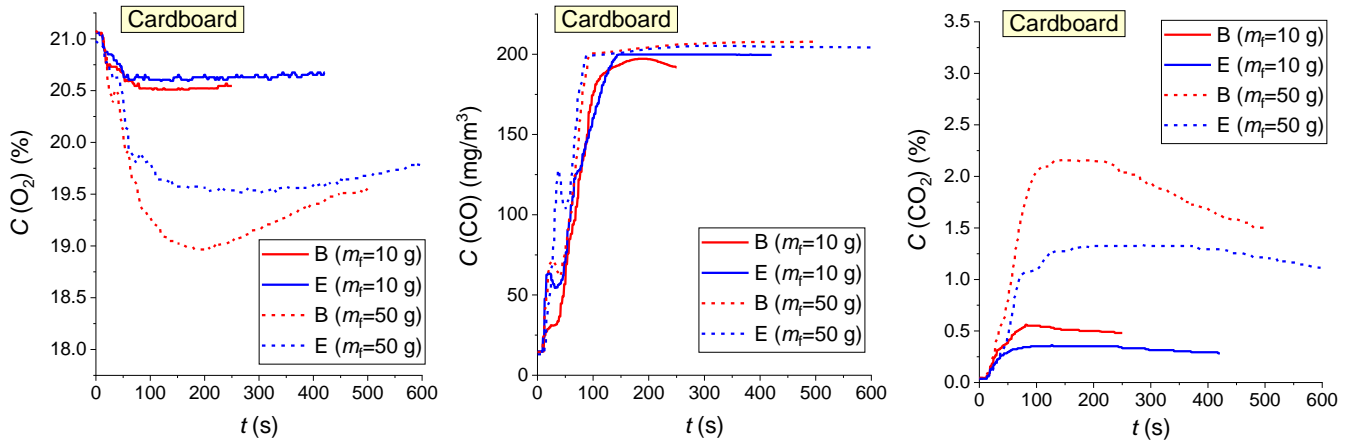

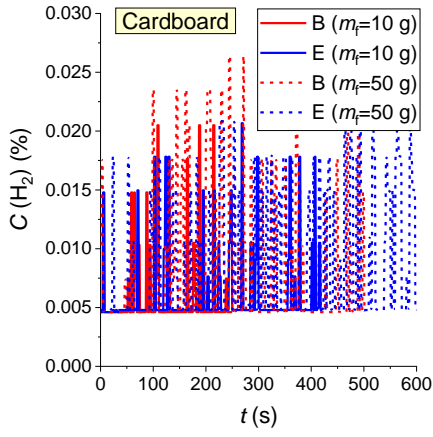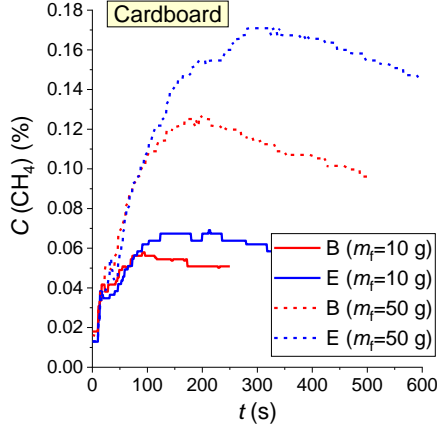

|                                       | Cardboard         |        |                   |        |
|---------------------------------------|-------------------|--------|-------------------|--------|
|                                       | $m_i=10\text{ g}$ |        | $m_i=50\text{ g}$ |        |
|                                       | B                 | E      | B                 | E      |
| $C(\text{O}_2)_{\min} (\%)$           | 20.51             | 20.61  | 18.97             | 19.51  |
| $C(\text{CO})_{\max} (\text{mg/m}^3)$ | 197.15            | 199.84 | 207.81            | 204.94 |
| $C(\text{CO}_2)_{\max} (\%)$          | 0.56              | 0.36   | 2.17              | 1.33   |
| $C(\text{H}_2)_{\max} (\%)$           | 0.021             | 0.021  | 0.026             | 0.021  |
| $C(\text{CH}_4)_{\max} (\%)$          | 0.058             | 0.069  | 0.12              | 0.171  |

*b*

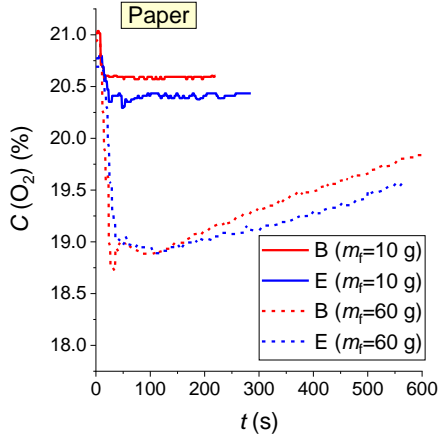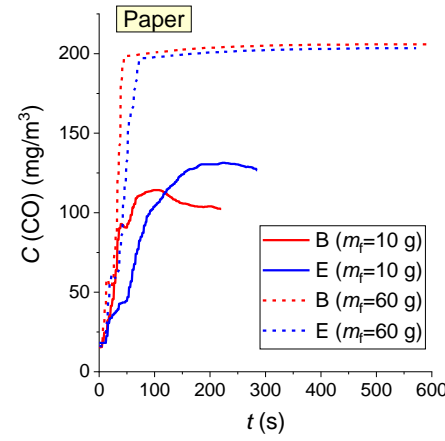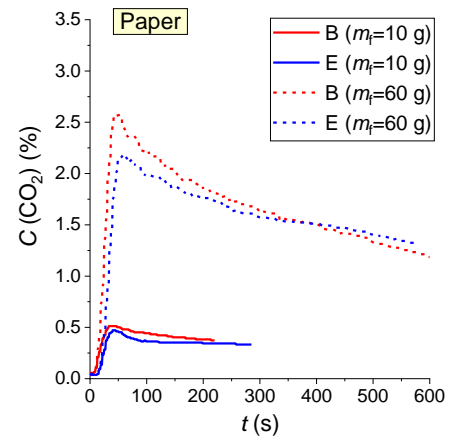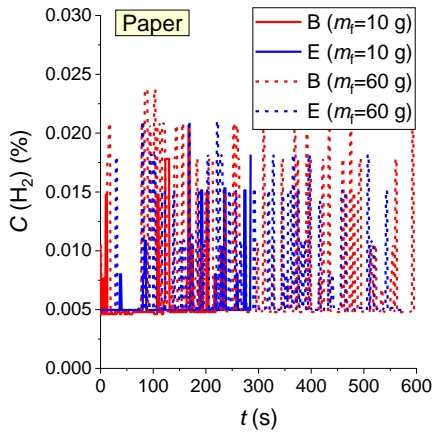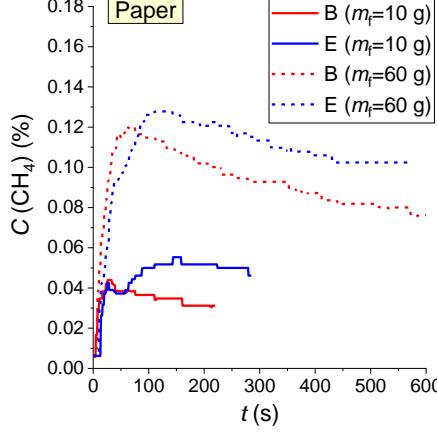

|                                       | Paper             |       |                   |        |
|---------------------------------------|-------------------|-------|-------------------|--------|
|                                       | $m_i=10\text{ g}$ |       | $m_i=60\text{ g}$ |        |
|                                       | B                 | E     | B                 | E      |
| $C(\text{O}_2)_{\min} (\%)$           | 20.57             | 20.31 | 18.72             | 18.89  |
| $C(\text{CO})_{\max} (\text{mg/m}^3)$ | 114.2             | 131.4 | 205.63            | 203.23 |
| $C(\text{CO}_2)_{\max} (\%)$          | 0.51              | 0.47  | 2.57              | 2.19   |
| $C(\text{H}_2)_{\max} (\%)$           | 0.021             | 0.018 | 0.024             | 0.021  |
| $C(\text{CH}_4)_{\max} (\%)$          | 0.044             | 0.055 | 0.12              | 0.128  |

*c*

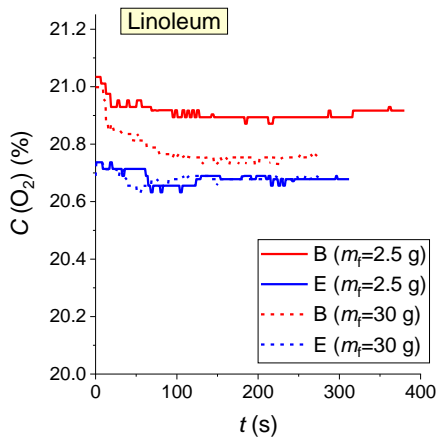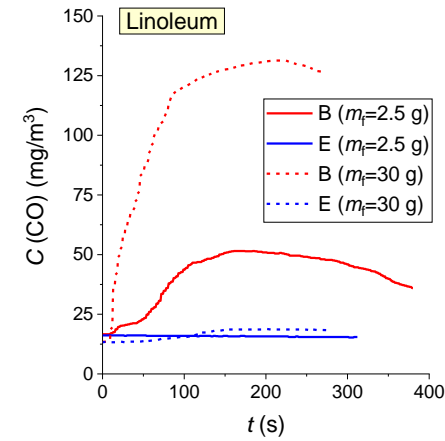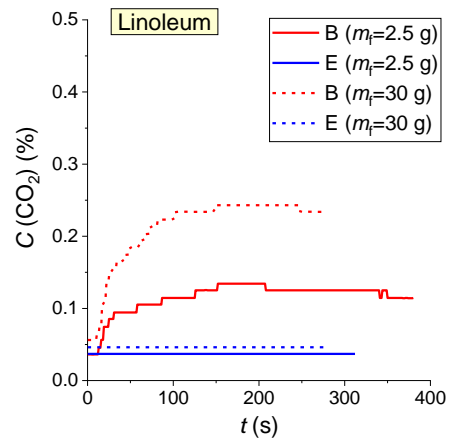

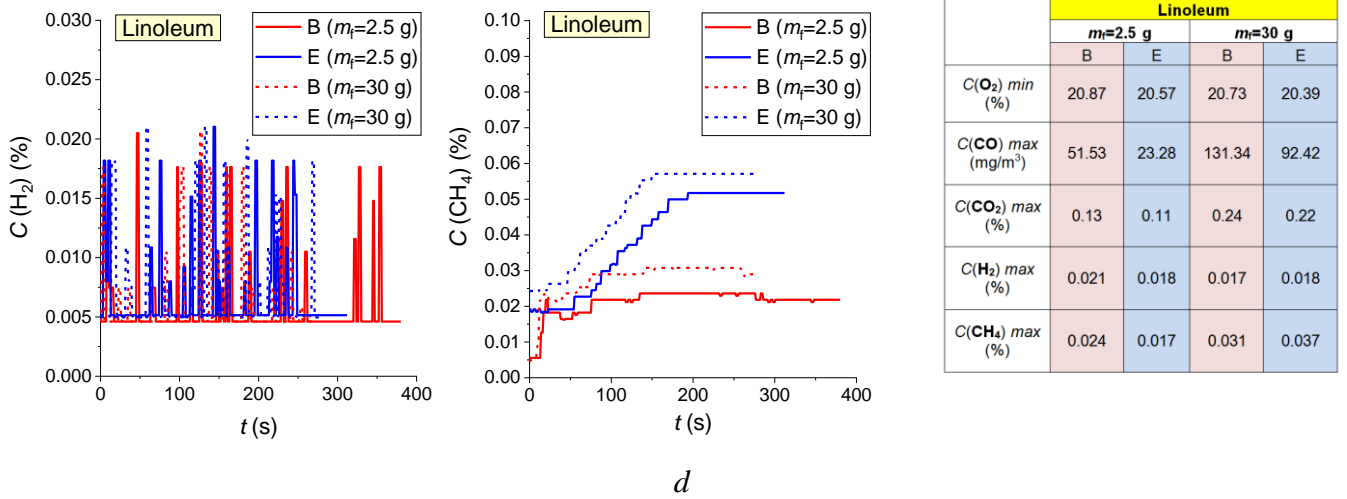

**Figure S1.** Trends of  $\text{O}_2$ ,  $\text{CO}$ ,  $\text{CO}_2$ ,  $\text{H}_2$  and  $\text{CH}_4$  concentrations obtained using GDS for the model fires under study when imitating the conditions of careless handling of fire (gas burner), and threshold concentrations of gas components (B – burning; E – extinguishing): *a* – wood; *b* – cardboard; *c* – paper; *d* – linoleum.

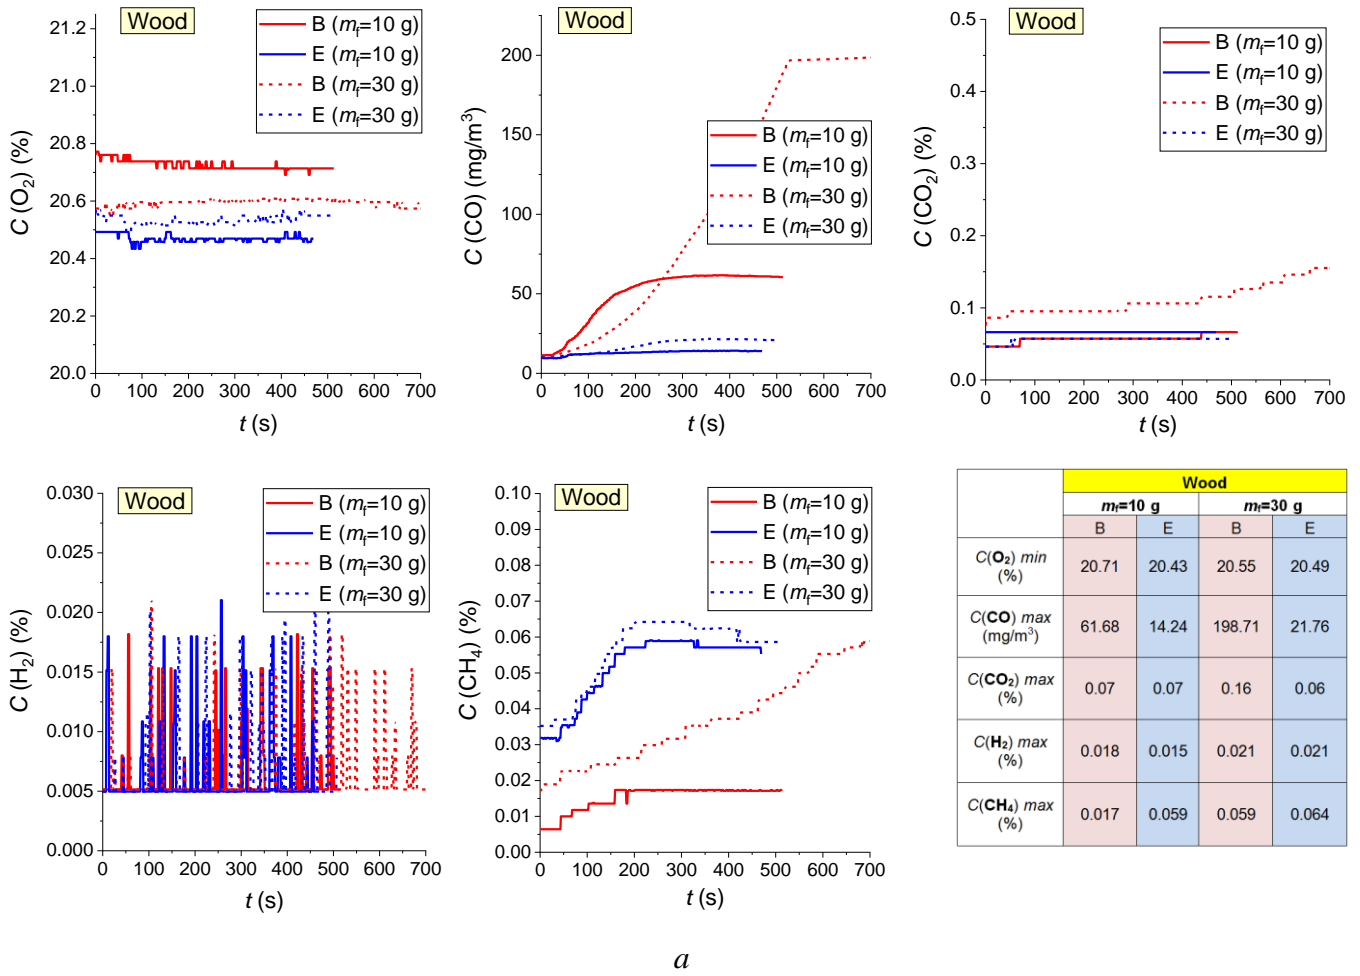

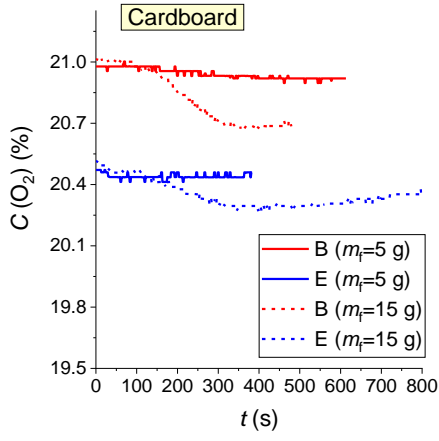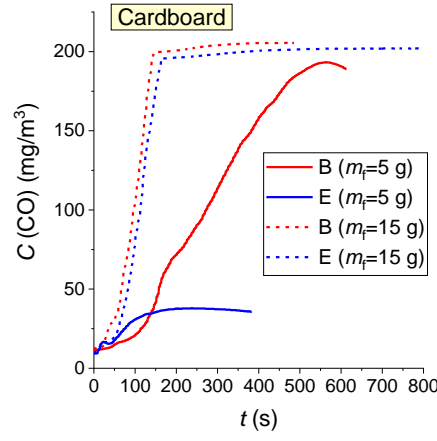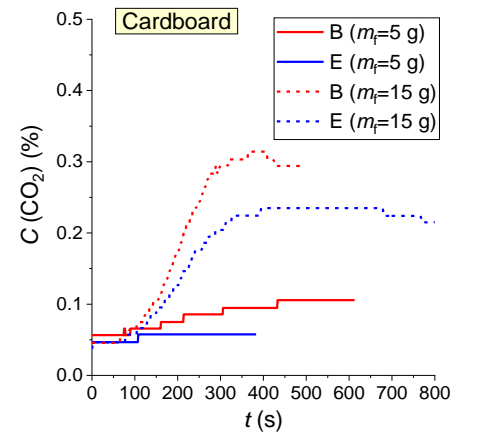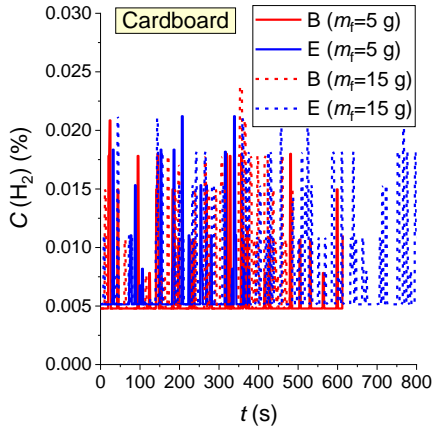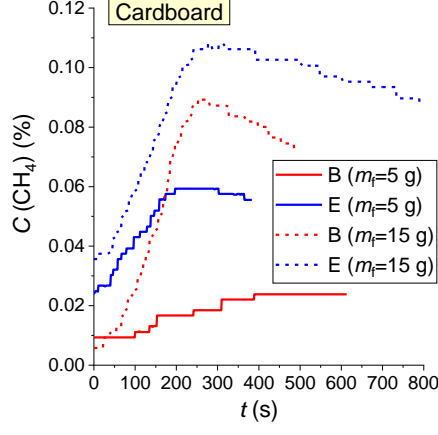

|                                       | Cardboard        |       |                   |        |
|---------------------------------------|------------------|-------|-------------------|--------|
|                                       | $m_i=5\text{ g}$ |       | $m_i=15\text{ g}$ |        |
|                                       | B                | E     | B                 | E      |
| $C(\text{O}_2)_{\min} (\%)$           | 20.89            | 20.41 | 20.68             | 20.27  |
| $C(\text{CO})_{\max} (\text{mg/m}^3)$ | 193.34           | 38.02 | 205.64            | 201.61 |
| $C(\text{CO}_2)_{\max} (\%)$          | 0.11             | 0.06  | 0.31              | 0.24   |
| $C(\text{H}_2)_{\max} (\%)$           | 0.021            | 0.021 | 0.024             | 0.021  |
| $C(\text{CH}_4)_{\max} (\%)$          | 0.024            | 0.059 | 0.089             | 0.108  |

*b*

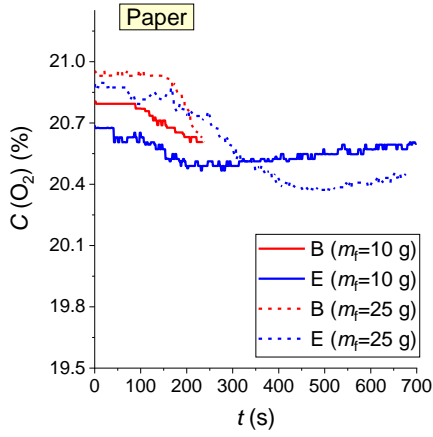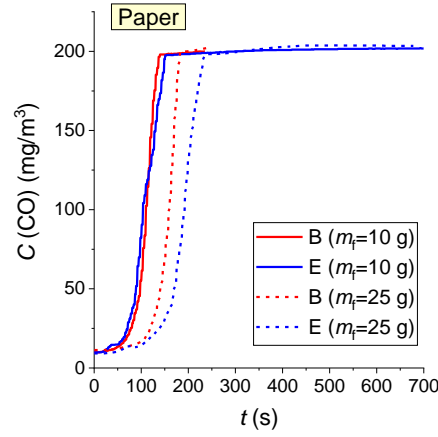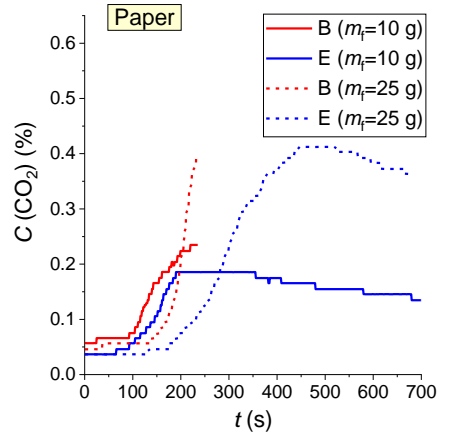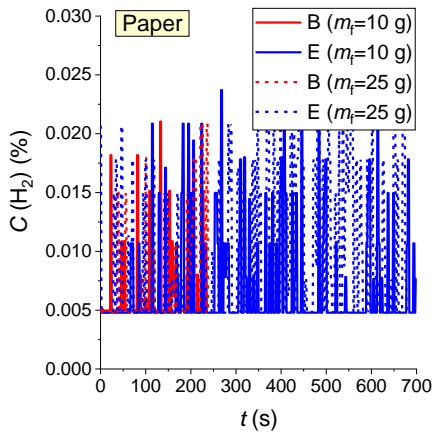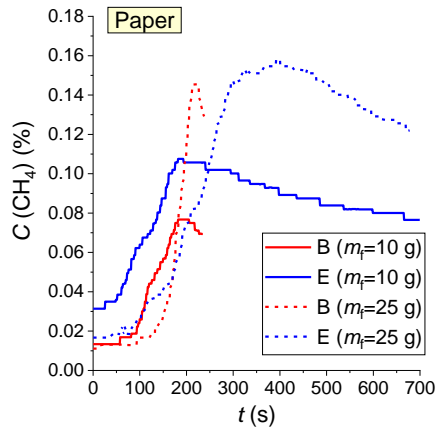

|                                       | Paper             |        |                   |        |
|---------------------------------------|-------------------|--------|-------------------|--------|
|                                       | $m_i=10\text{ g}$ |        | $m_i=25\text{ g}$ |        |
|                                       | B                 | E      | B                 | E      |
| $C(\text{O}_2)_{\min} (\%)$           | 20.61             | 20.47  | 20.61             | 20.37  |
| $C(\text{CO})_{\max} (\text{mg/m}^3)$ | 199.97            | 202.04 | 202.06            | 203.78 |
| $C(\text{CO}_2)_{\max} (\%)$          | 0.24              | 0.19   | 0.39              | 0.41   |
| $C(\text{H}_2)_{\max} (\%)$           | 0.021             | 0.023  | 0.021             | 0.021  |
| $C(\text{CH}_4)_{\max} (\%)$          | 0.077             | 0.108  | 0.146             | 0.153  |

*c*

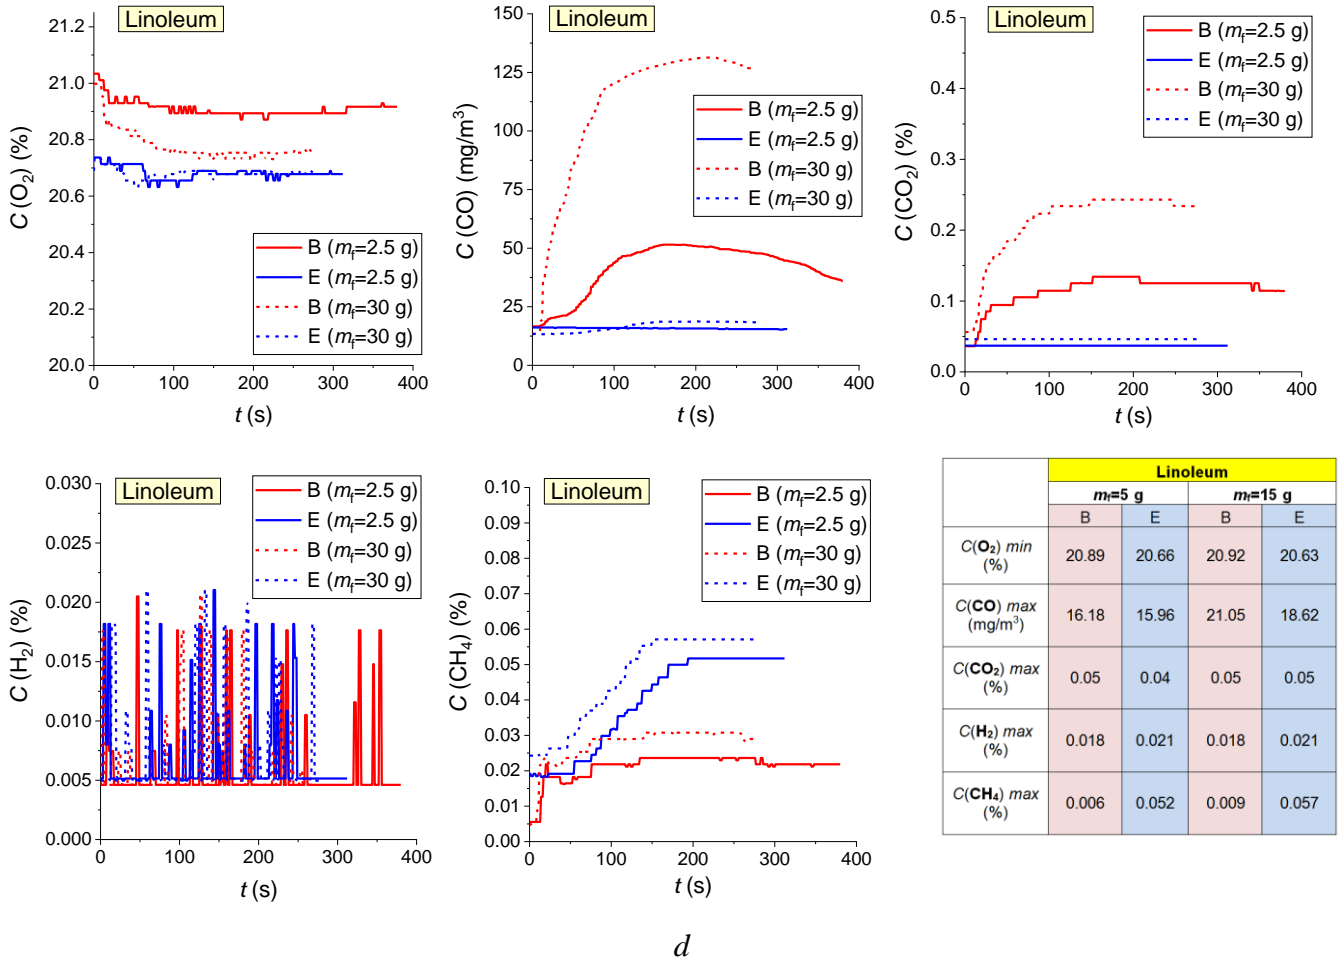

**Figure S2.** Trends of O<sub>2</sub>, CO, CO<sub>2</sub>, H<sub>2</sub> and CH<sub>4</sub> concentrations obtained using GDS for the model fires under study when imitating the conditions of improper use of heating equipment (*hot plate*), and threshold concentrations of gas components (B – burning; E – extinguishing): *a* – wood; *b* – cardboard; *c* – paper; *d* – linoleum.

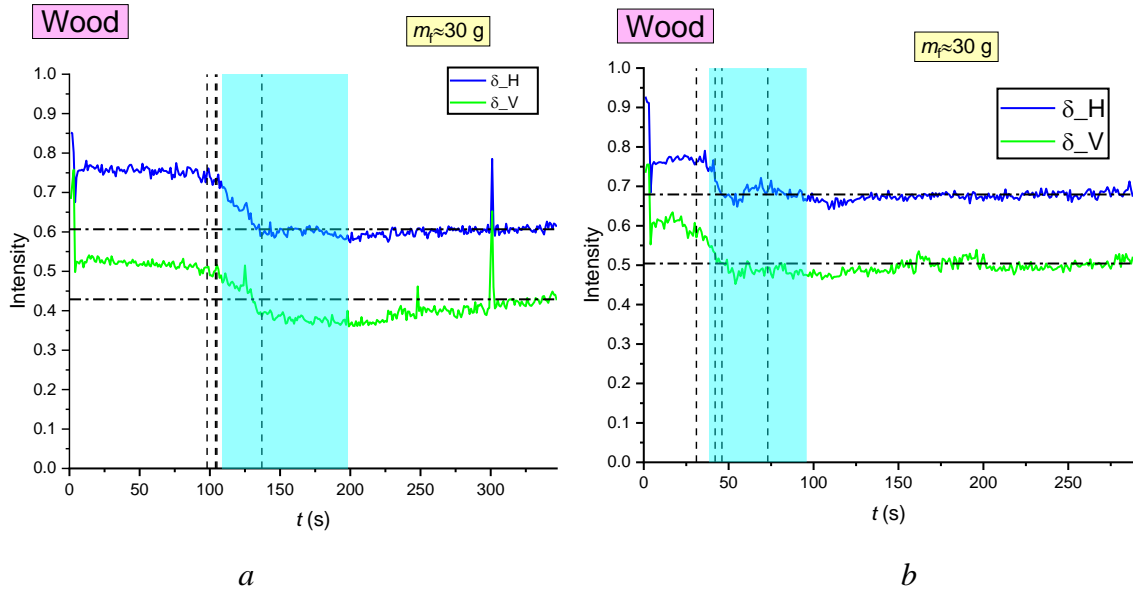

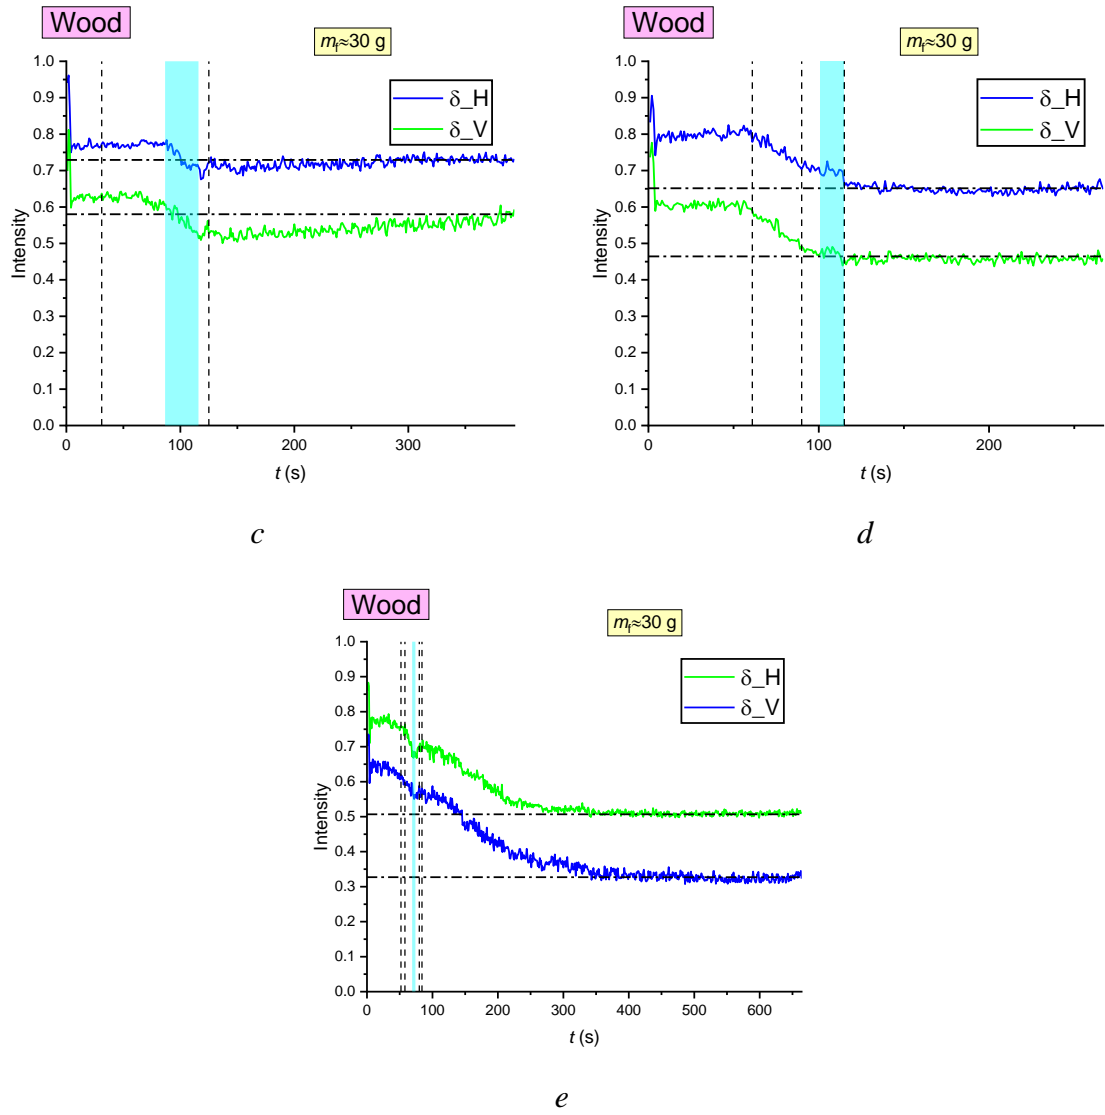

**Figure S3.** Change in  $\delta$  when reproducing the conditions of improper use of heating equipment (*hot plate*) for the model fires consisting of wood with different duration of extinguishment: *a* – 90 s; *b* – 60 s; *c* – 30 s; *d* – 15 s; *e* – 5 s.

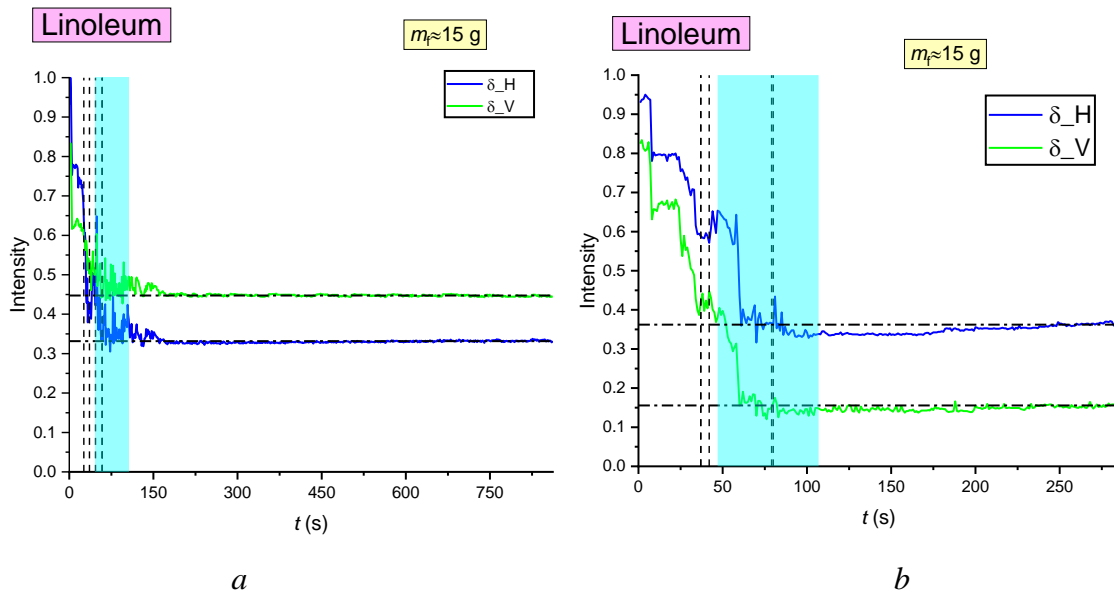

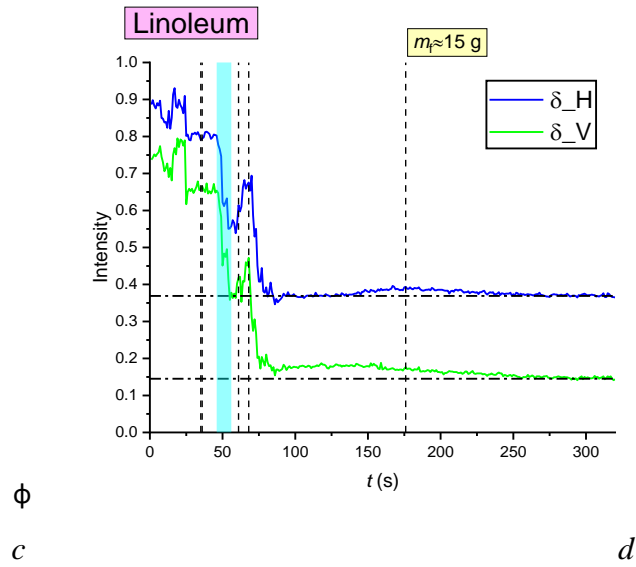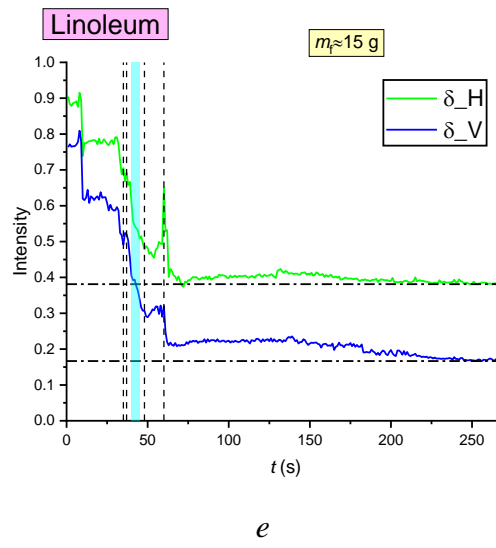

**Figure S4.** Change in  $\delta$  when reproducing the conditions of improper use of heating equipment (*hot plate*) for the model fires consisting of linoleum with different duration of extinguishment: *a* – 60 s; *b* – 30 s; *c* – 15 s; *d* – 10 s; *e* – 5 s.

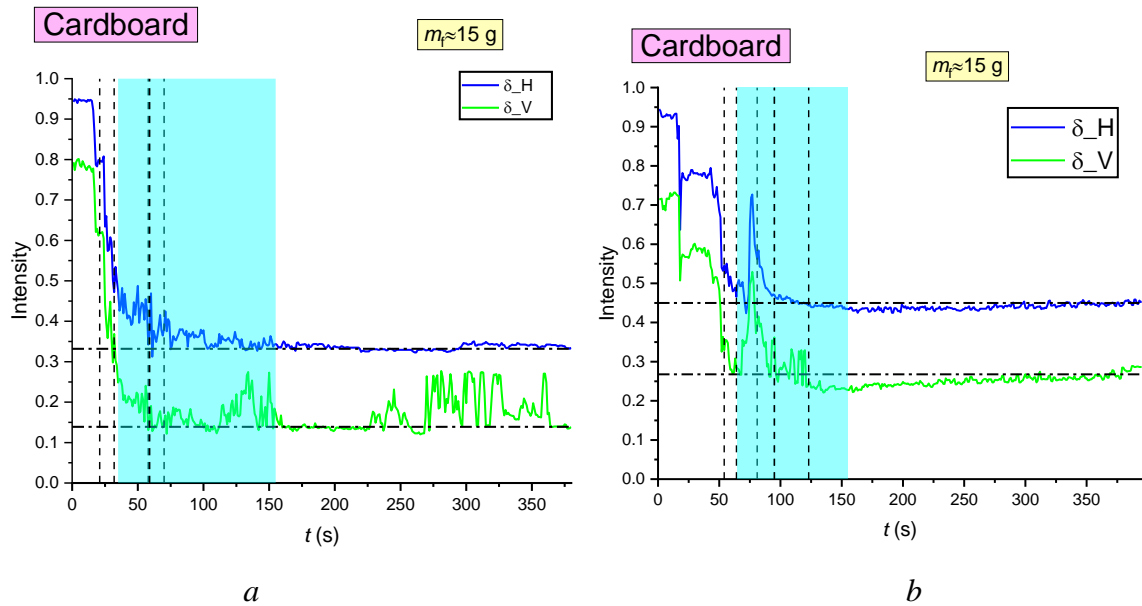

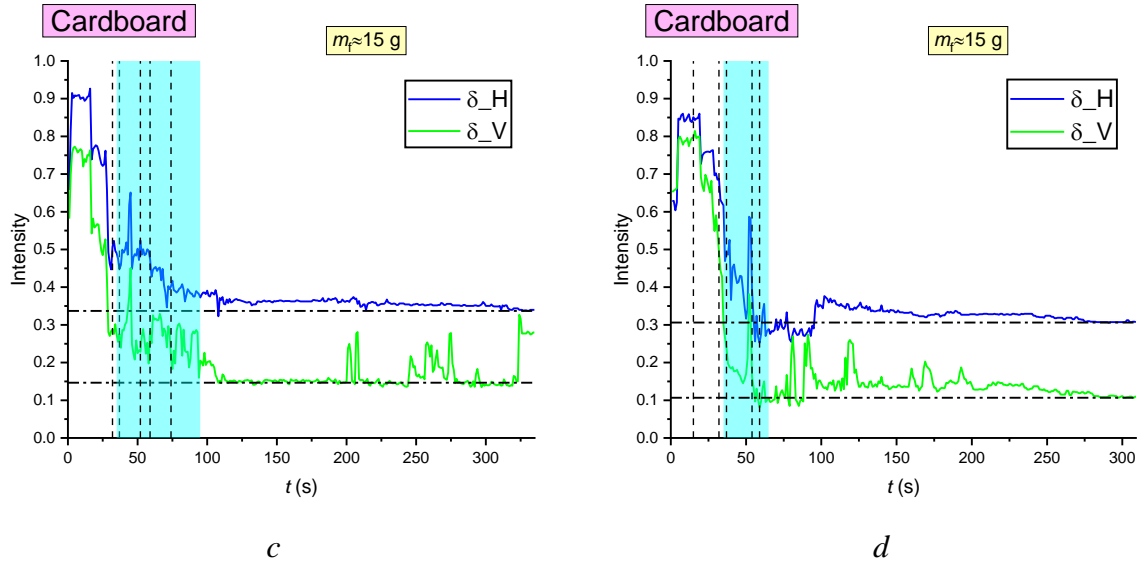

**Figure S5.** Change in  $\delta$  when reproducing the conditions of improper use of heating equipment (*hot plate*) for the model fires consisting of cardboard with different duration of extinguishment: *a* – 120 s; *b* – 90 s; *c* – 60 s; *d* – 30 s.



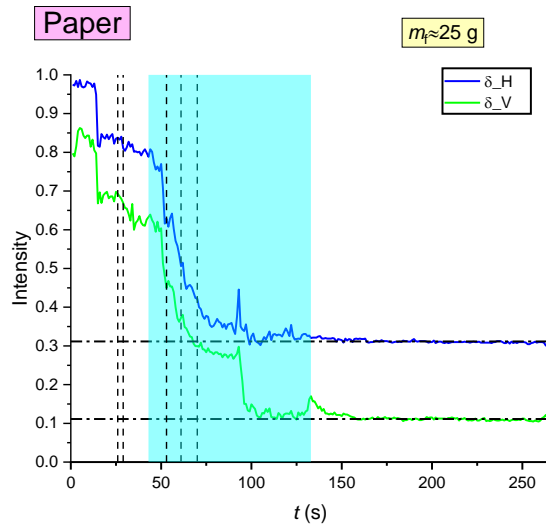

*a*

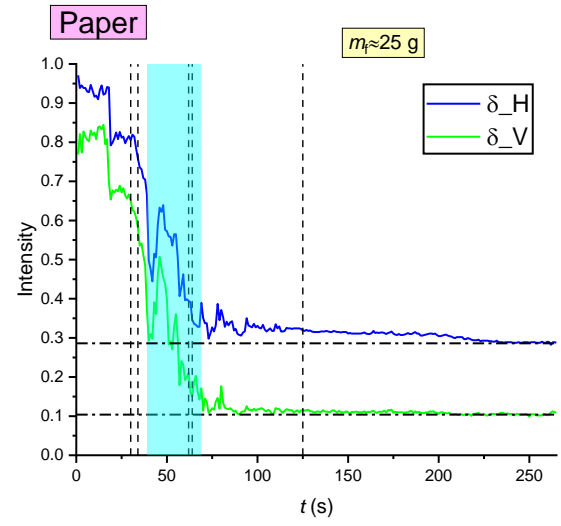

*b*

**Figure S6.** Change in  $\delta$  when reproducing the conditions of improper use of heating equipment (*hot plate*) for the model fires consisting of paper with different duration of extinguishment: *a* – 90 s; *b* – 30 s.

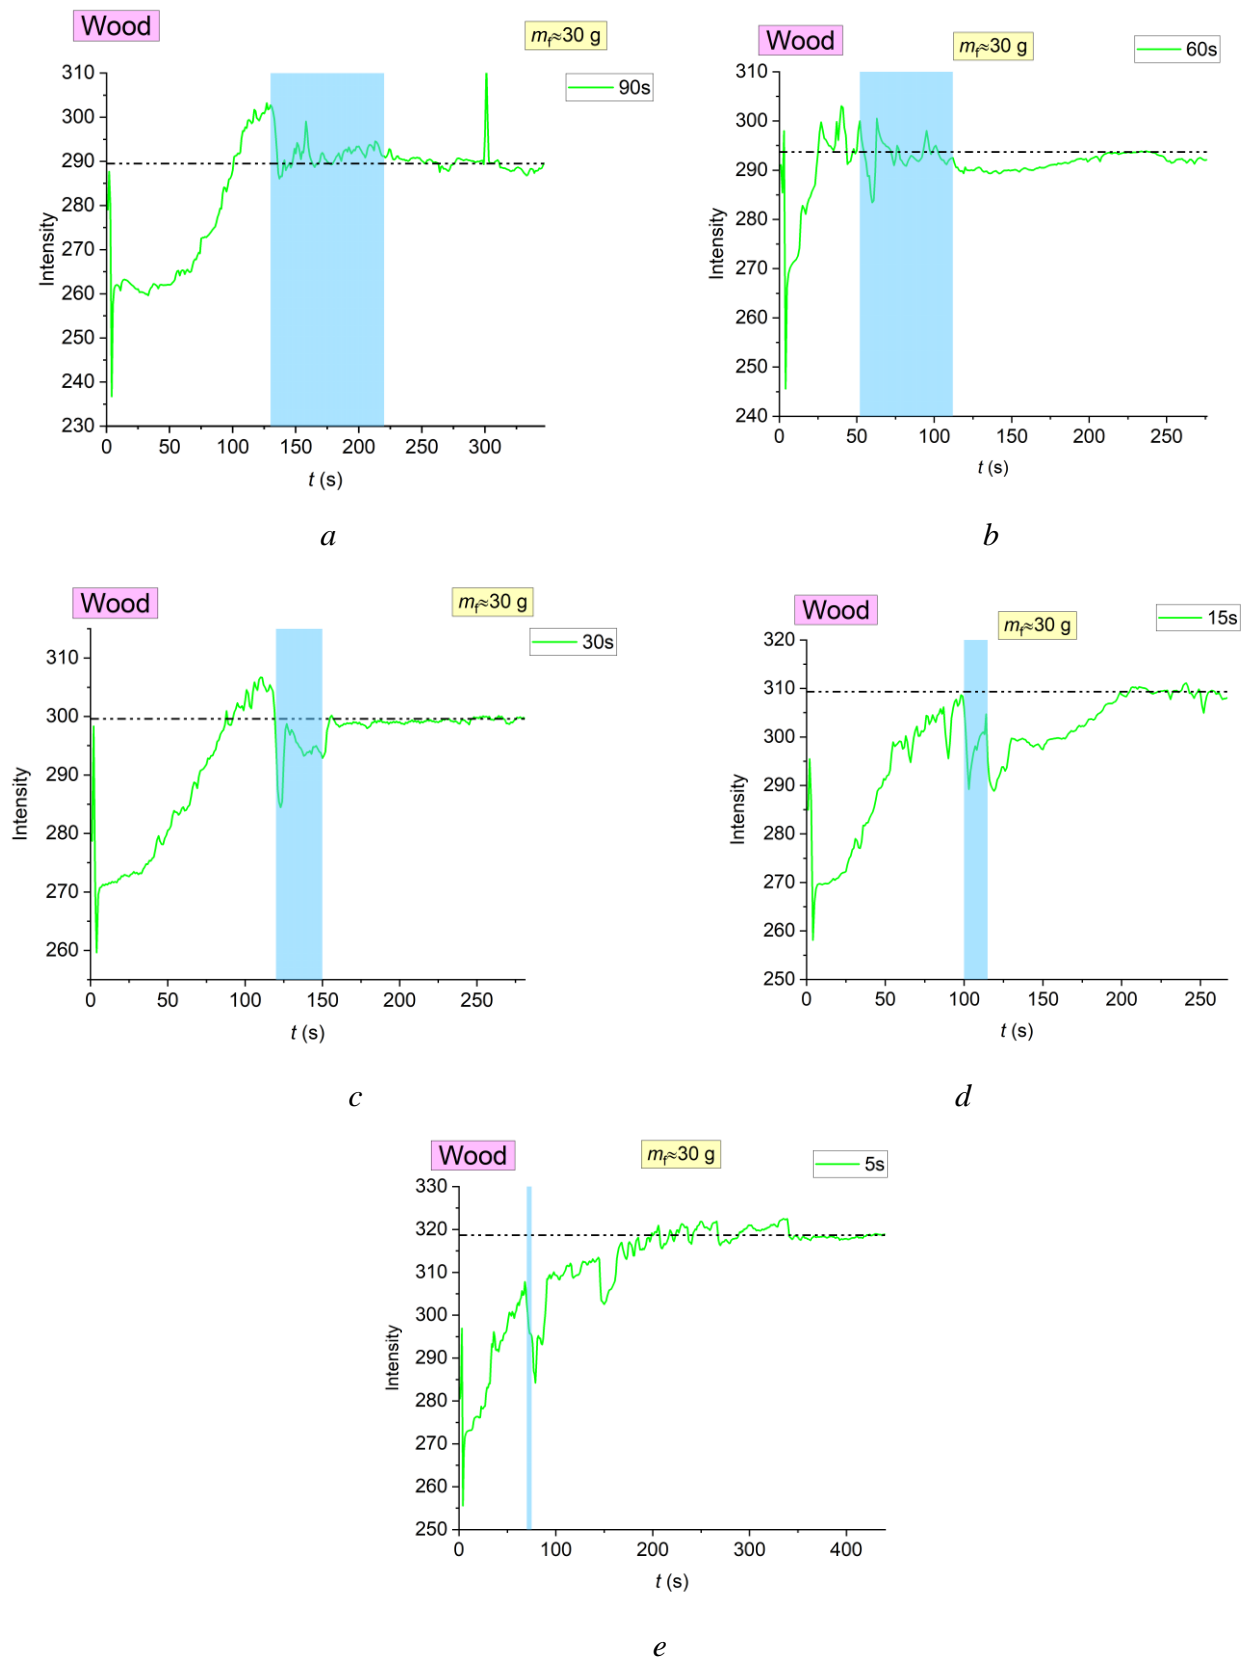

**Figure S7.** Change in the absolute average intensity of images when reproducing the conditions of improper use of heating equipment (*hot plate*) for the fires involving wood with different duration of extinguishment: *a* – 90 s; *b* – 60 s; *c* – 30 s; *d* – 15 s; *e* – 5 s.

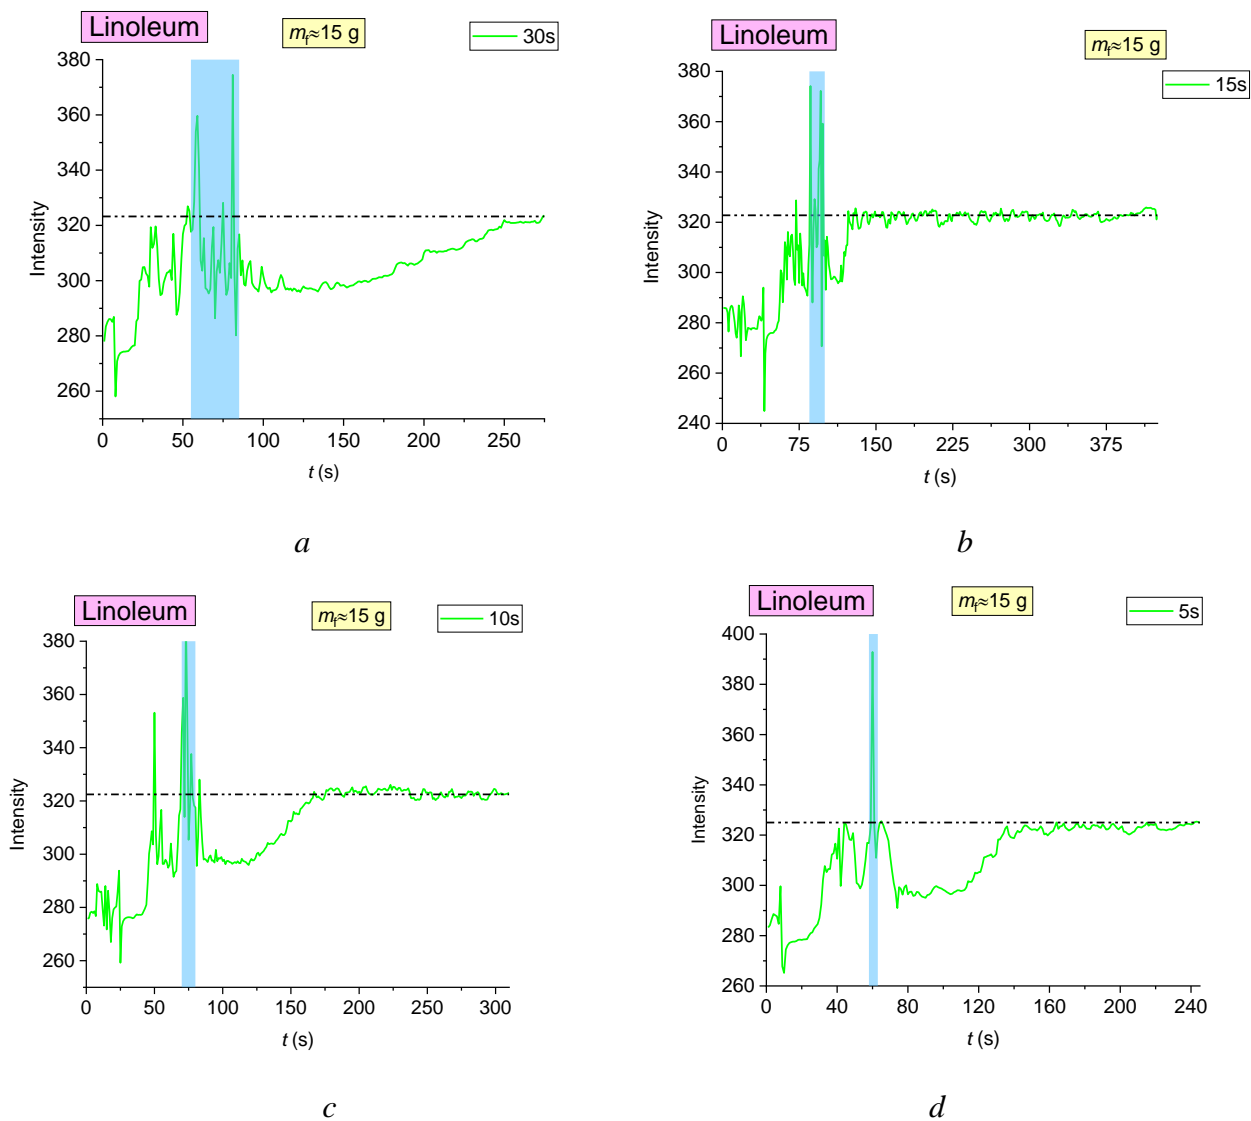

**Figure S8.** Change in  $\delta$  when reproducing the conditions of improper use of heating equipment (*hot plate*) for model fires consisting of linoleum with different duration of extinguishment: *a* – 30 s; *b* – 15 s; *c* – 10 s; *d* – 5 s.

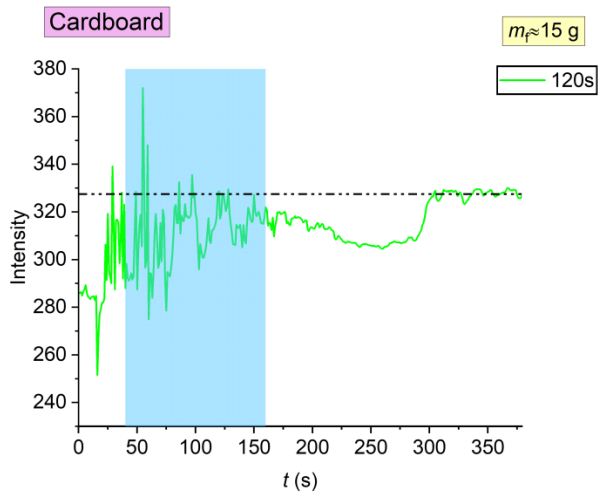

*a*

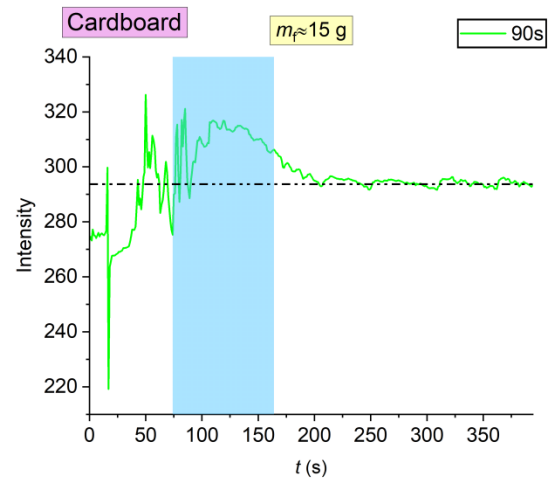

*b*

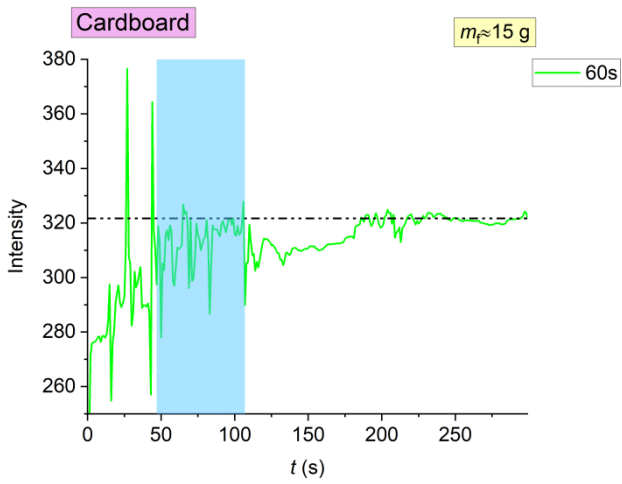

*c*

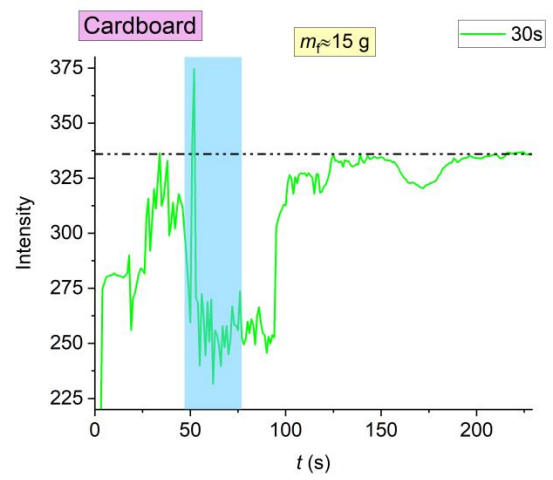

*d*

**Figure S9.** Change in  $\delta$  when reproducing the conditions of improper use of heating equipment (*hot plate*) for the fires consisting of cardboard with different duration of extinguishment: *a* – 120 s; *b* – 90 s; *c* – 60 s; *d* – 30 s.

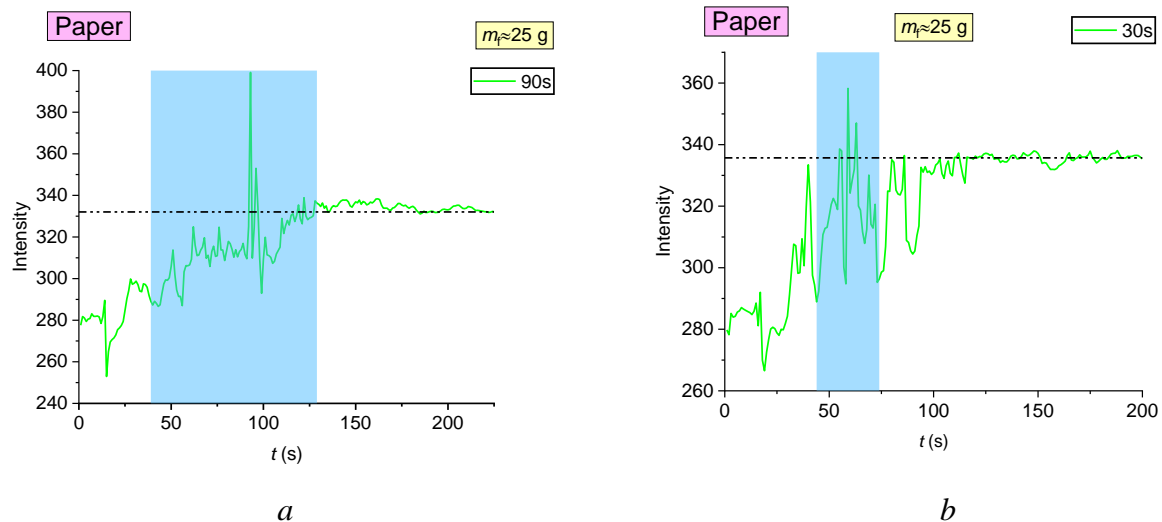

**Figure S10.** Change in  $\delta$  when reproducing the conditions of improper use of heating equipment (*hot plate*) for the fires consisting of paper with different duration of extinguishment: *a* – 90 s; *b* – 30 s.
